# Supplementary material
Source: HighWire-hosted journal article supplement (https://www.cmajopen.ca/highwire/filestream/80897/field_highwire_adjunct_files/1/open-2014-0006-02-at.pdf)
Supplement: open-2014-0006-02-at.pdf [file open-2014-0006-02-at.pdf]

**Appendix 2 (as supplied by the authors): Receiver operating characteristic (ROC) association statistics: 5-year group (2004–2008)**

| ROC Association Statistics |                            |                |                            |        |           |        |        |
|----------------------------|----------------------------|----------------|----------------------------|--------|-----------|--------|--------|
| ROC Model                  | Mann-Whitney               |                |                            |        | Somers' D | Gamma  | Tau-a  |
|                            | Area Under the Curve (AUC) | Standard Error | 95% Wald Confidence Limits |        | (Gini)    |        |        |
| Definition 1               | 0.8949                     | 0.00366        | 0.8877                     | 0.902  | 0.7897    | 0.9736 | 0.274  |
| Definition 2               | 0.8972                     | 0.00375        | 0.8898                     | 0.9045 | 0.7944    | 0.9773 | 0.2756 |
| Definition 3               | 0.8584                     | 0.00454        | 0.8494                     | 0.8673 | 0.7167    | 0.9973 | 0.2487 |
| Definition 4               | 0.7368                     | 0.00505        | 0.7269                     | 0.7467 | 0.4736    | 0.9948 | 0.1643 |

**\*Case Definitions:**

- 1      **Any ONE outpatient dialysis claim**
- 2      **Any TWO outpatient dialysis claims**
- 3      **Any TWO outpatient dialysis claims >90 days apart**
- 4      **Any TWO outpatient dialysis claims >90 days apart (no gaps >21 days)**
